# Supplementary material
Source: MDPI journal article supplement (https://www.mdpi.com/2311-5637/8/9/469)
Supplement: s1 [file s1]

(A)

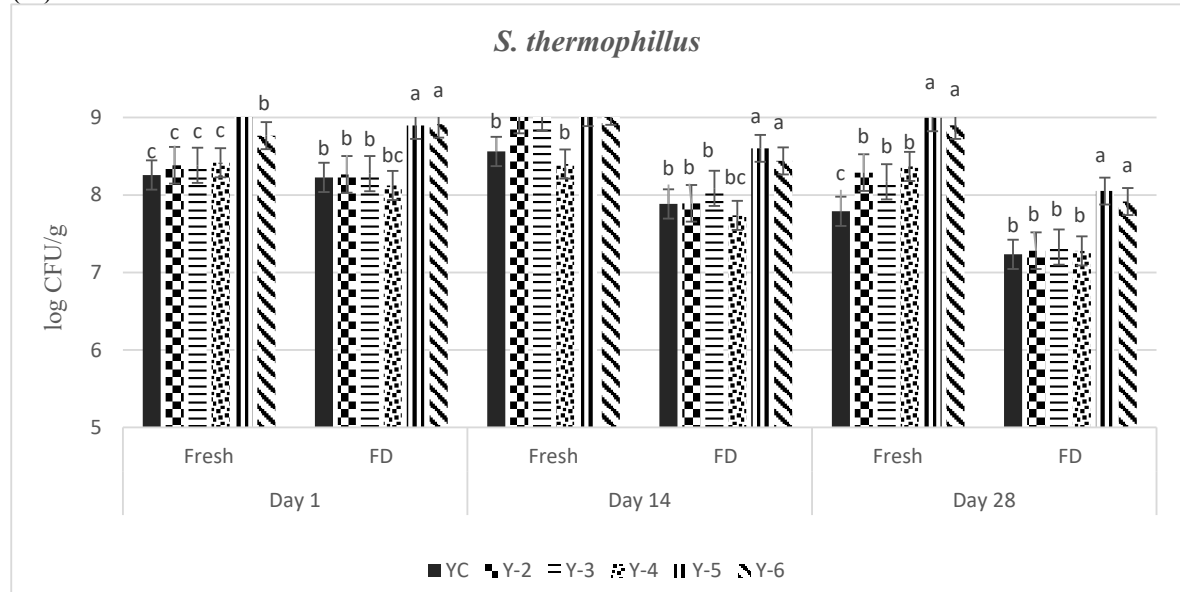

(B)

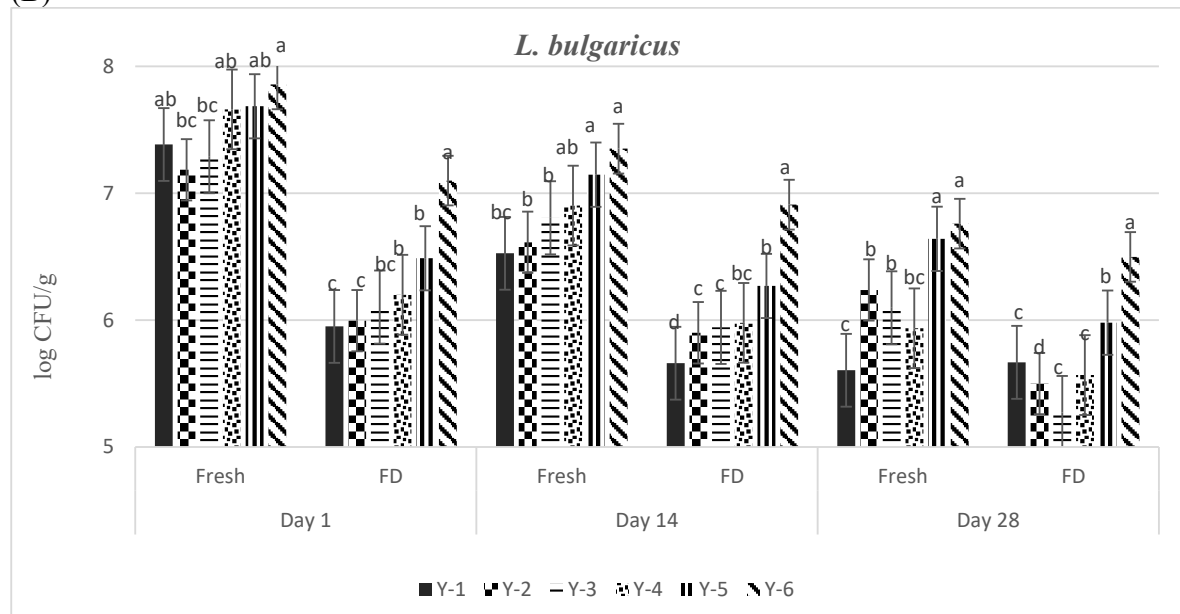

(C)

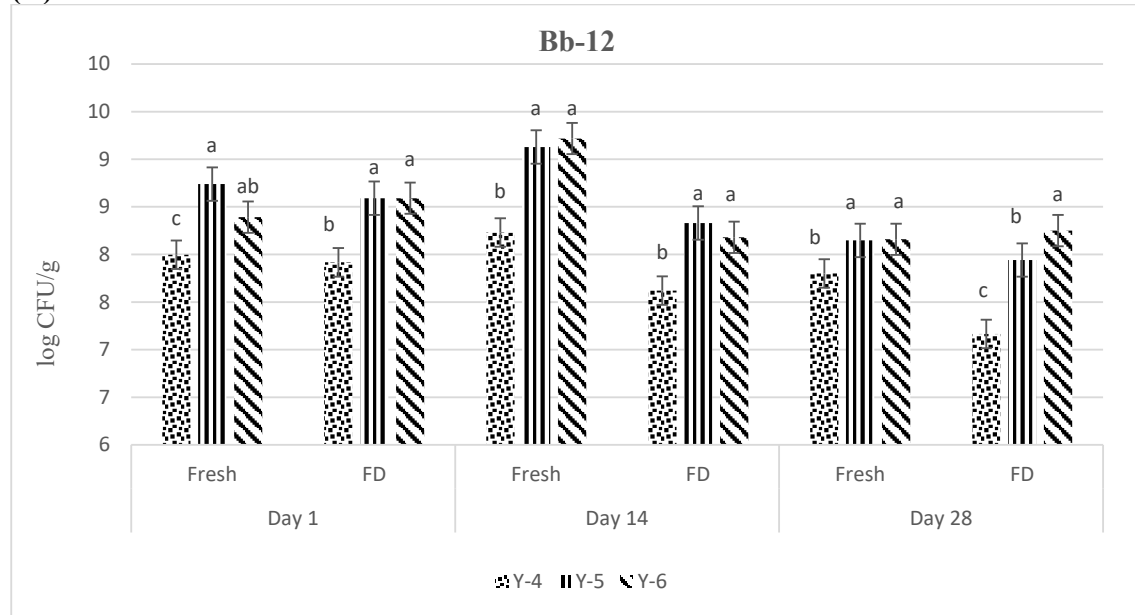

(D)

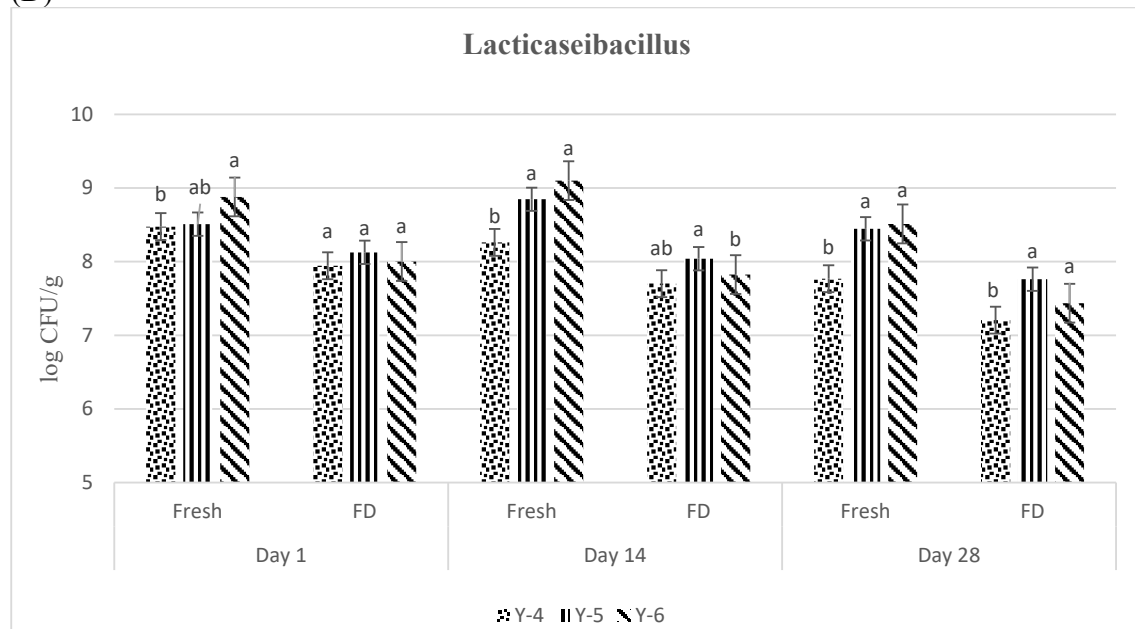

**Figure S1. Viability (CFU/g) of yoghurt starters and lactic acid bacteria during refrigerated storage of fresh and RFD yoghurts**

Values are presented as means  $\pm$ SD (n=3). Means followed by similar superscript letters in fresh and RFD treatments within each storage interval indicate insignificant differences ( $p>0.05$ ).

\*Absence of Y-1, Y-2, and Y-3 within (C) and (D) denotes that those were not inoculated with lactobacilli and Bb-12 as indicated in Table 1.
